# Supplementary material
Source: PubMed Central journal article supplement (PMC1965516)

CLIP-170 C-term. →  
GST-CAP-Gly2 →  
GST →

GST

GST-CAP-Gly2 wild

GST-CAP-Gly2 K224A

GST-CAP-Gly2 K238A

GST-CAP-Gly2 K252A

GST-CAP-Gly2 K268A

GST-CAP-Gly2 K277A

GST-CAP-Gly2 K297A

GST-CAP-Gly2 K298A

GST-CAP-Gly2 N253A

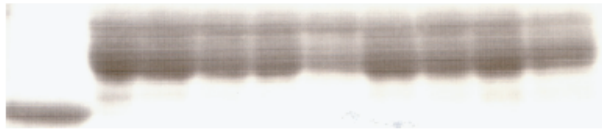

Supplement: pnas_0703876104_8.pdf [file pnas_0703876104_8.pdf]
